# Supplementary material
Source: publisher site journal article supplement (http://kjim.org/upload/media/kjim-2020-282-suppl4.pdf)
Supplement: Supplementary file 1 [file kjim-2020-282-suppl4.pdf]

**Supplementary Table 4. Factors associated with the detection of active TB in the sensitivity analysis population**

| Factor                                          | Univariate        |                | Multivariate      |                |
|-------------------------------------------------|-------------------|----------------|-------------------|----------------|
|                                                 | OR (95% CI)       | <i>p</i> value | aOR (95% CI)      | <i>p</i> value |
| Initial screening with chest CT vs. chest X-ray | 6.08 (0.75–49.03) | 0.090          | 6.06 (0.75–49.03) | 0.091          |
| Age                                             | 0.97 (0.92–1.03)  | 0.328          | 0.97 (0.92–1.03)  | 0.333          |
| Male sex                                        | 1.79 (0.44–7.30)  | 0.416          | 1.95 (0.47–8.06)  | 0.355          |

TB, tuberculosis; OR, odds ratio; CI, confidence interval; aOR, adjusted odds ratio; CT, computed tomography.
